# Supplementary material for: Mapping Condition-Dependent Regulation of Lipid Metabolism in Saccharomyces cerevisiae
Source: PubMed Central journal article supplement (PMC3815060; doi:10.1534/g3.113.006601), 2013-11-01
Supplement: supp_g3.113.006601_FigureS10.pdf [file supp_g3.113.006601_FigureS10.pdf]

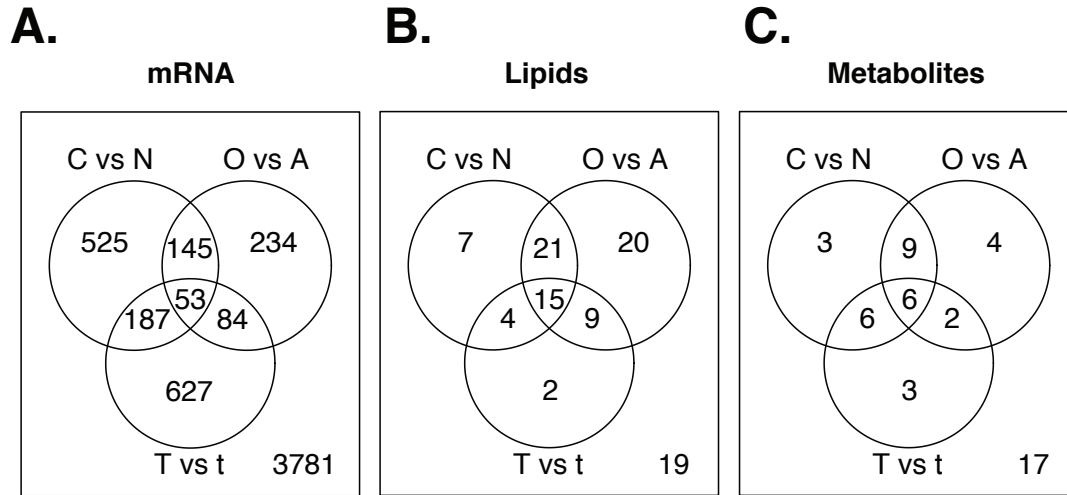

**Figure S10** The overlap amongst significant genes (A), lipids (B), and metabolites (C) at a threshold of  $P \leq 0.001$  following Bonferroni correction across experimental conditions. C-limited, "C"; N-limited, "N"; aerobic, "O"; anaerobic, "A"; 30°C, "T"; and 15°C, "t". See Table S4 for the list of genes from the Multi-way ANOVA.
