# Supplementary material for: Mapping Condition-Dependent Regulation of Lipid Metabolism in Saccharomyces cerevisiae
Source: PubMed Central journal article supplement (PMC3815060; doi:10.1534/g3.113.006601), 2013-11-01
Supplement: supp_g3.113.006601_FigureS12.pdf [file supp_g3.113.006601_FigureS12.pdf]

## Phospholipid biosynthesis

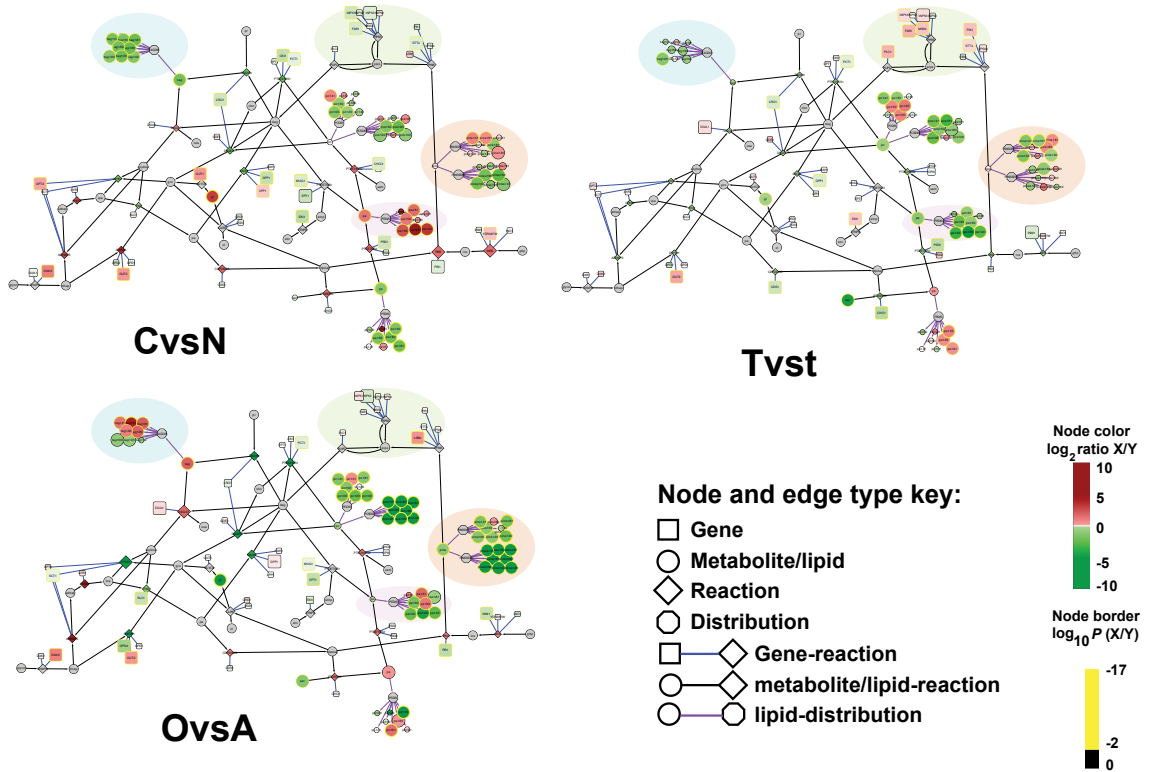

**Figure S12** The condition dependent response of phospholipid biosynthesis comparing C-limited versus N-limited, 30°C versus 15°C, and aerobic versus anaerobic conditions. The areas highlighted show different up- and down- regulation patterns illustrating how Cytoscape visualization enables the targeted and rapid identification of changes across the cell. C-limited, “C”; N-limited, “N”; aerobic, “O”; anaerobic, “A”; 30°C, “T”; and 15°C, “t”. Measurement ratios were visualized with a  $\log_2$  color-bar and the color of each node border represents the  $\log_{10}(p\text{-value})$  (see node and edge color key). Gray coloring indicates the lack of a measurement for that node.
