# Supplementary material for: Mapping Condition-Dependent Regulation of Lipid Metabolism in Saccharomyces cerevisiae
Source: PubMed Central journal article supplement (PMC3815060; doi:10.1534/g3.113.006601), 2013-11-01
Supplement: supp_g3.113.006601_FigureS20.pdf [file supp_g3.113.006601_FigureS20.pdf]

**A.**

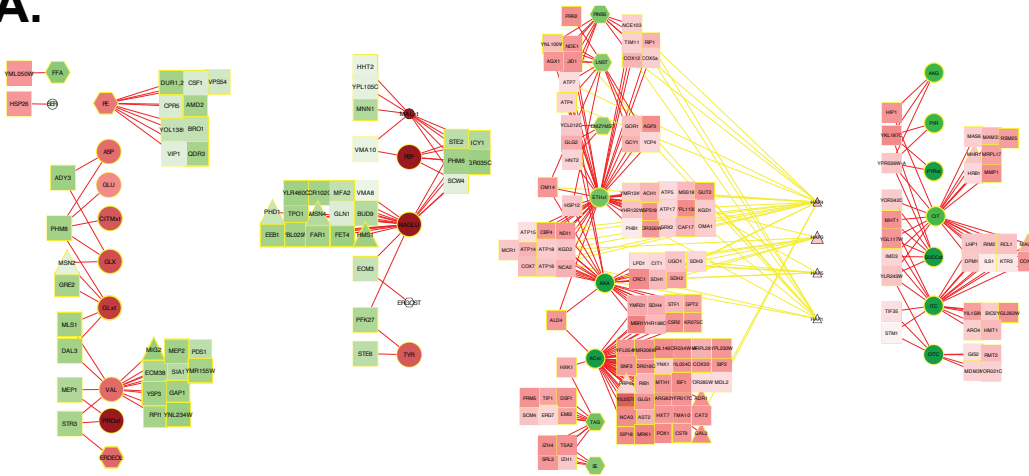

**C-limited versus N-limited:  
negative PCC correlations**

**B.**

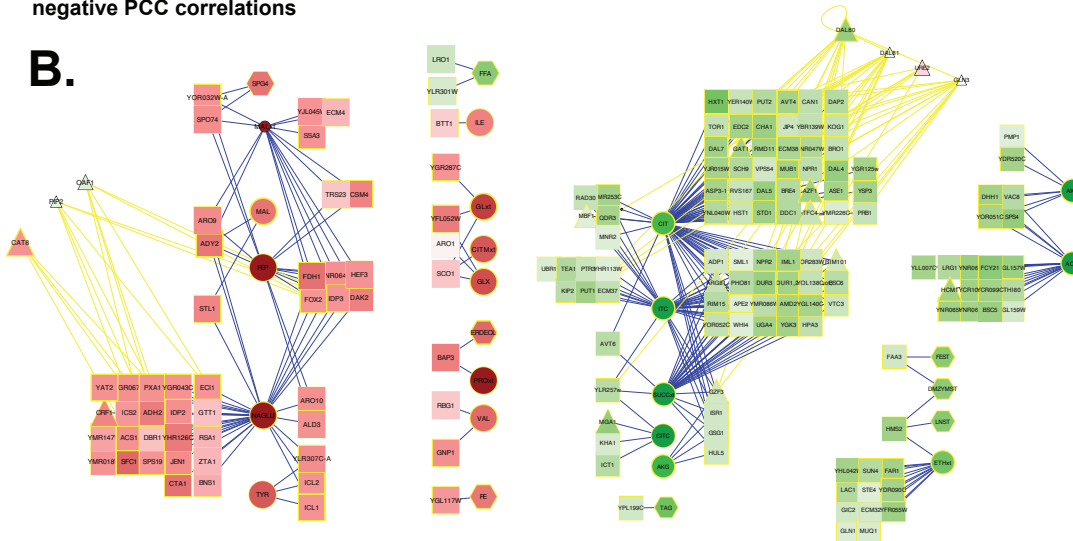

**C-limited versus N-limited:  
positive PCC correlations**

**Node and edge type key:**

- Gene
- Metabolite
- Lipid
- △ Transcription Factor
- Negative correlation
- Positive correlation
- Transcription factor interaction

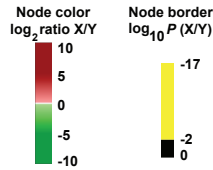

**Figure S20** Correlation analysis demonstrates significant ( $P \leq 0.001$  following Bonferroni correction) gene-lipid and gene-metabolite relationships when comparing carbon-limited versus nitrogen-limited conditions. (A) Negative Pearson Correlation Coefficients (PCC). (B) Positive Pearson Correlation Coefficients (PCC). Enriched transcription factors are shown (yellow edges). Measurement ratios were visualized with a  $\log_2$  color-bar and the color of each node border represents the  $\log_{10}(p\text{-value})$  (see node and edge color key).
